# Supplementary material for: Carbazole-based green and blue-BODIPY dyads and triads as donors for bulk heterojunction organic solar cells
Source: Royal Society of Chemistry journal article supplement (doi:10.1039/d0dt00637h), 2020-01-01
Supplement: d0dt00637h1.pdf [file d0dt00637h1.pdf]

## Supporting Information

---

# Carbazole Green and Blue-BODIPY Dyads and Triads as Donors for Bulk Heterojunction Organic Solar Cells

Jian Yang, Charles H. Devillers, Paul Fleurat-Lessard, Hao Jiang, Shifa Wang, Claude P. Gros, Gaurav Gupta, Ganesh D. Sharma, and Haijun Xu

---

### Table of contents

|                  |                                                                         |       |
|------------------|-------------------------------------------------------------------------|-------|
| <b>Figure S1</b> | <sup>1</sup> H-NMR spectrum of compound <b>B2</b> in CDCl <sub>3</sub>  | p. 2  |
| <b>Figure S2</b> | <sup>13</sup> C-NMR spectrum of compound <b>B2</b> in CDCl <sub>3</sub> | p. 3  |
| <b>Figure S3</b> | <sup>1</sup> H-NMR spectrum of compound <b>B3</b> in CDCl <sub>3</sub>  | p. 4  |
| <b>Figure S4</b> | <sup>13</sup> C-NMR spectrum of compound <b>B3</b> in CDCl <sub>3</sub> | p. 5  |
| <b>Figure S5</b> | HRMS (ESI) spectrum of compound <b>B2</b>                               | p. 6  |
| <b>Figure S6</b> | HRMS (ESI) spectrum of compound <b>B3</b>                               | p. 7  |
| <b>Table S1</b>  | Photophysical data of compounds <b>B2</b> , <b>B3</b> in DCM            | p. 8  |
| <b>Figure S7</b> | UV-vis spectra of compounds <b>B2</b> , <b>B3</b> in DCM                | p. 9  |
| <b>Figure S8</b> | Emission spectra of compounds <b>B2</b> , <b>B3</b> in DCM              | p. 10 |
| <b>Figure S9</b> | XRD patterns of pristine <b>B2</b> and <b>B3</b>                        | p. 11 |

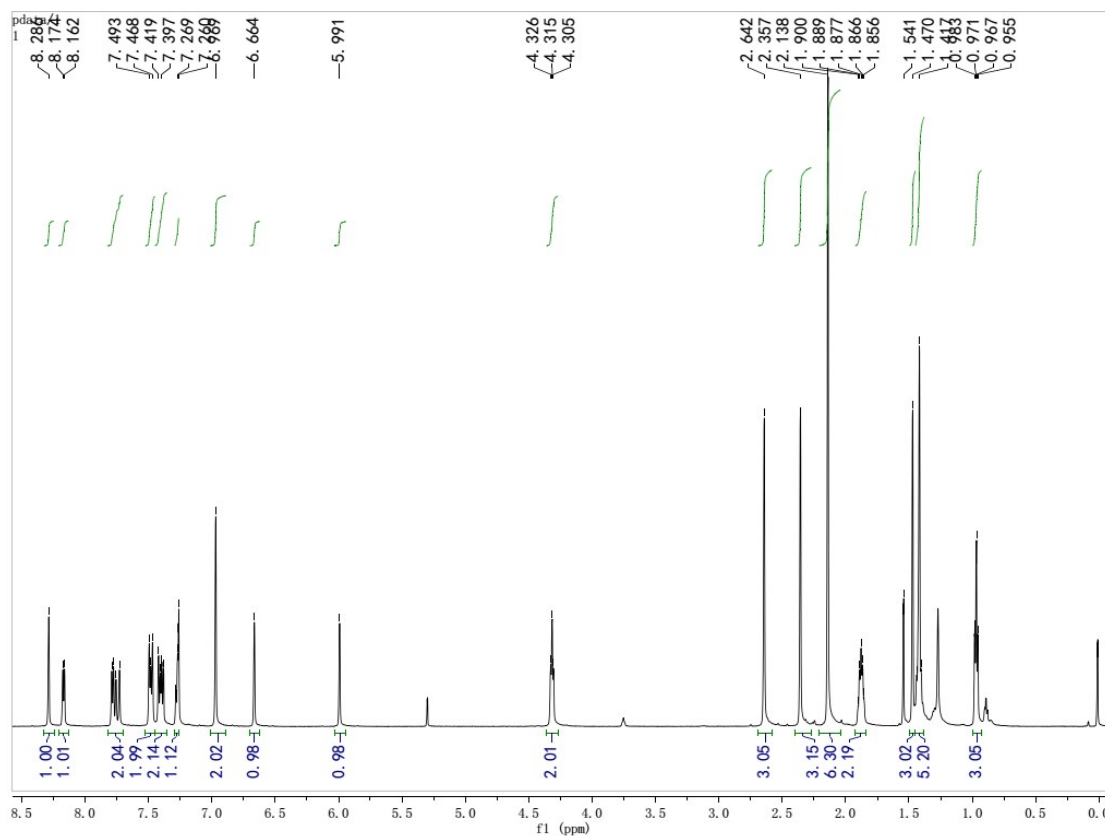

**Figure S1.**  $^1\text{H-NMR}$  spectrum (600 MHz,  $\text{CDCl}_3$ , 298 K) of compound **B2** in  $\text{CDCl}_3$

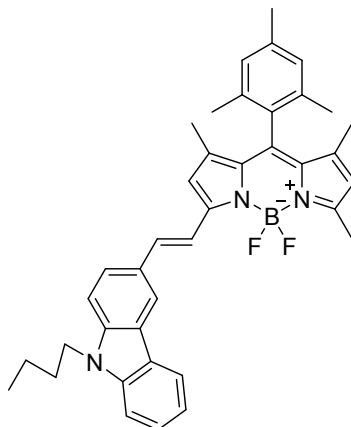

Chemical Formula:  $\text{C}_{39}\text{H}_{40}\text{BF}_2\text{N}_3$

Exact Mass: 599.328

Molecular Weight: 599.577

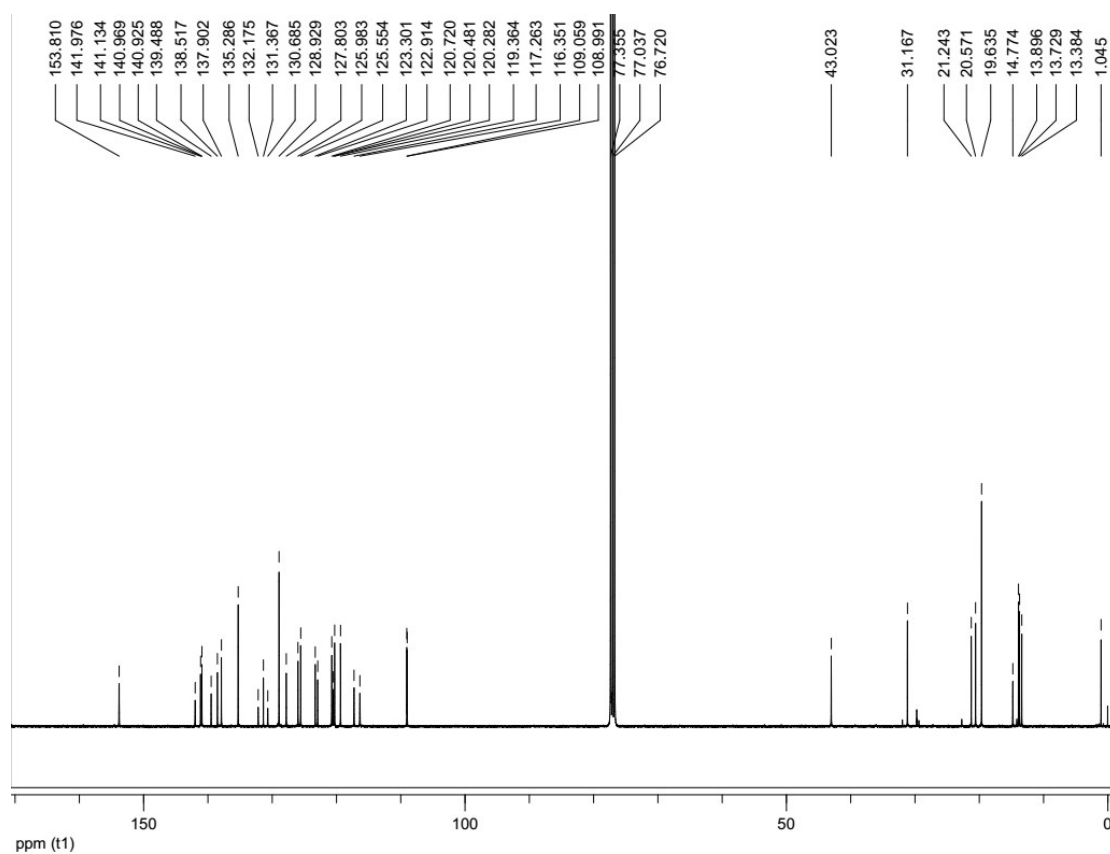

**Figure S2.**  $^{13}\text{C}$ -NMR spectrum (150 MHz,  $\text{CDCl}_3$ , 298 K) of compound **B2** in  $\text{CDCl}_3$

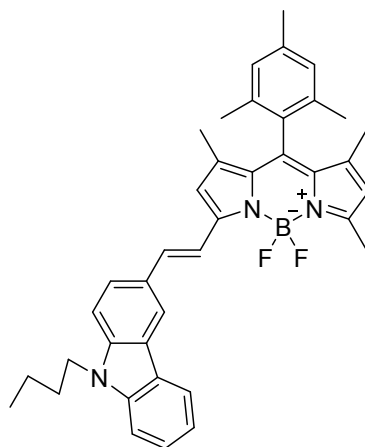

Chemical Formula:  $\text{C}_{39}\text{H}_{40}\text{BF}_2\text{N}_3$

Exact Mass: 599.328

Molecular Weight: 599.577

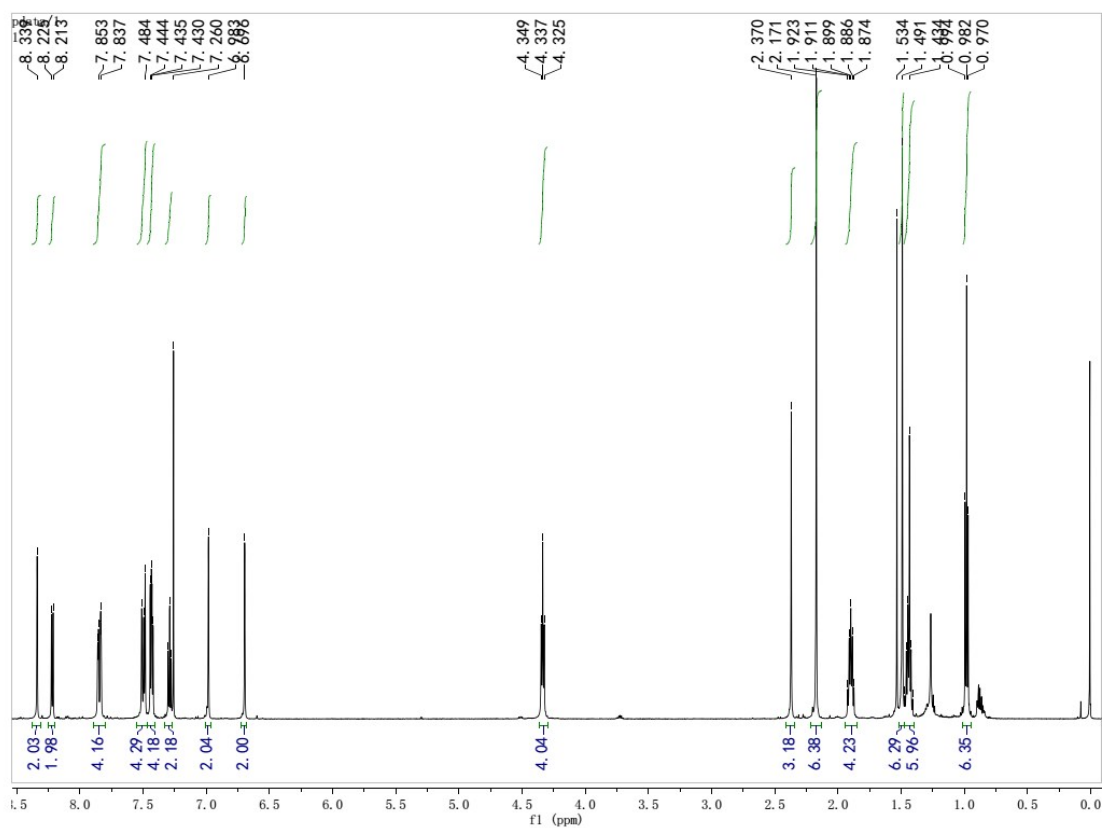

**Figure S3.**  $^1\text{H-NMR}$  spectrum (600 MHz,  $\text{CDCl}_3$ , 298 K) of compound **B3** in  $\text{CDCl}_3$

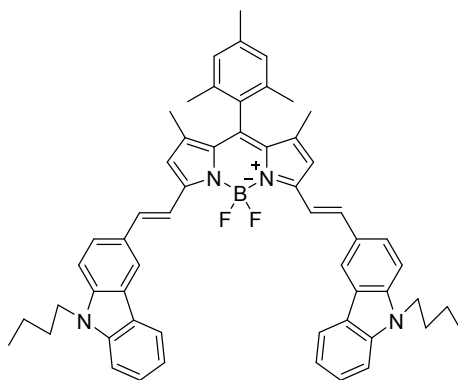

Chemical Formula:  $\text{C}_{56}\text{H}_{55}\text{BF}_2\text{N}_4$

Exact Mass: 832.449

Molecular Weight: 832.891

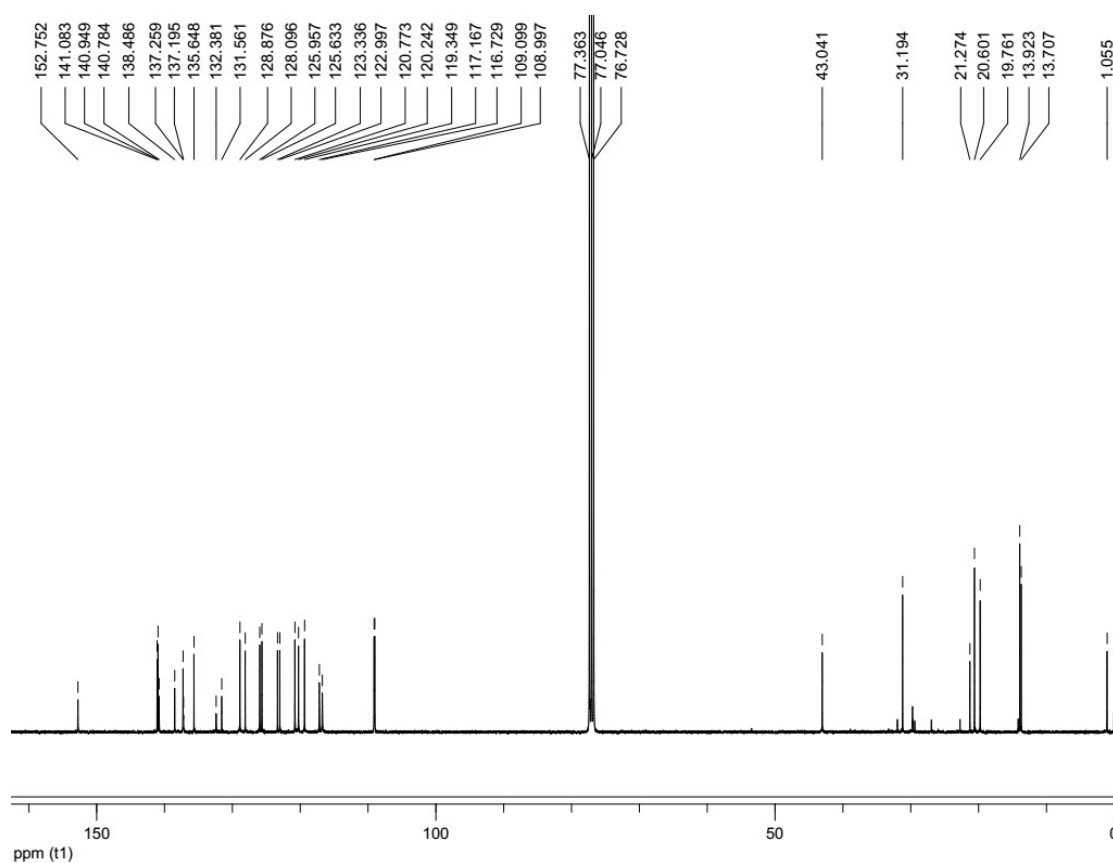

**Figure S4.**  $^{13}\text{C}$ -NMR spectrum (150 MHz,  $\text{CDCl}_3$ , 298 K) of compound **B3** in  $\text{CDCl}_3$

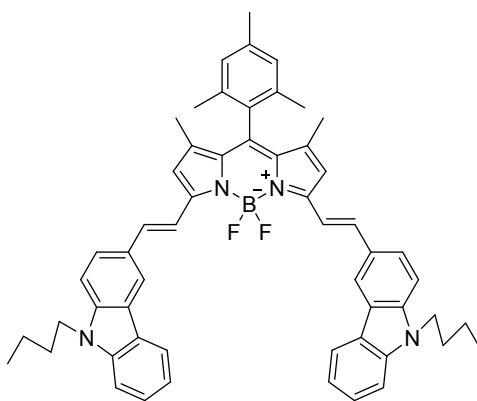

Chemical Formula:  $\text{C}_{56}\text{H}_{55}\text{BF}_2\text{N}_4$

Exact Mass: 832.449

Molecular Weight: 832.891

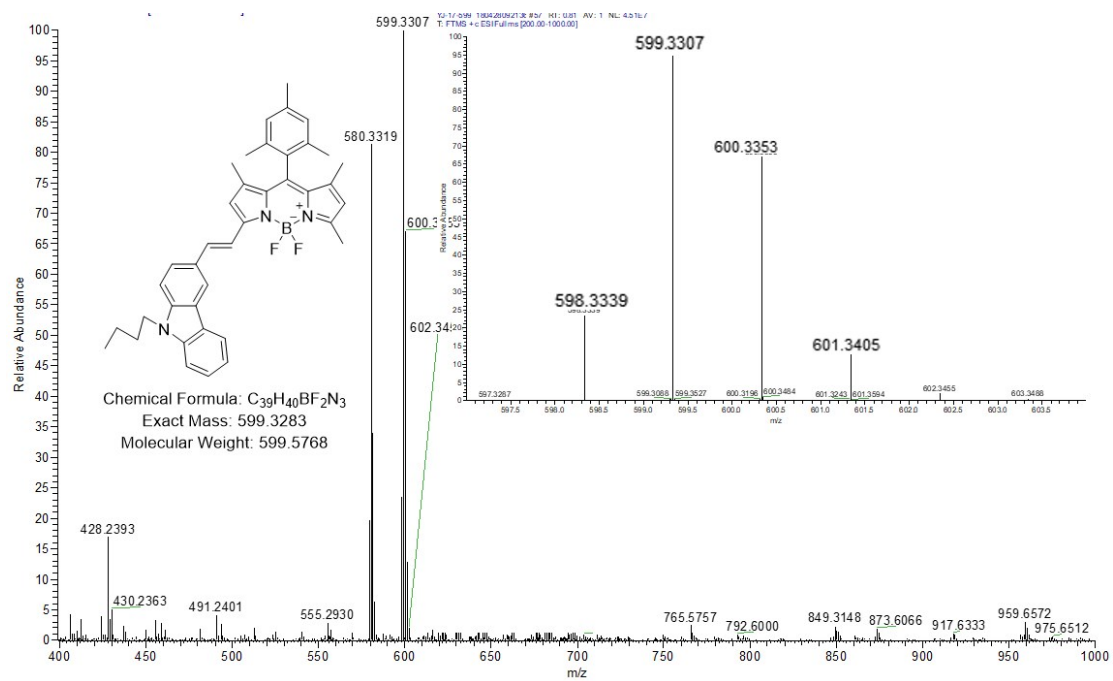

**Figure S5.** HRMS (ESI) spectra of compound **B2**

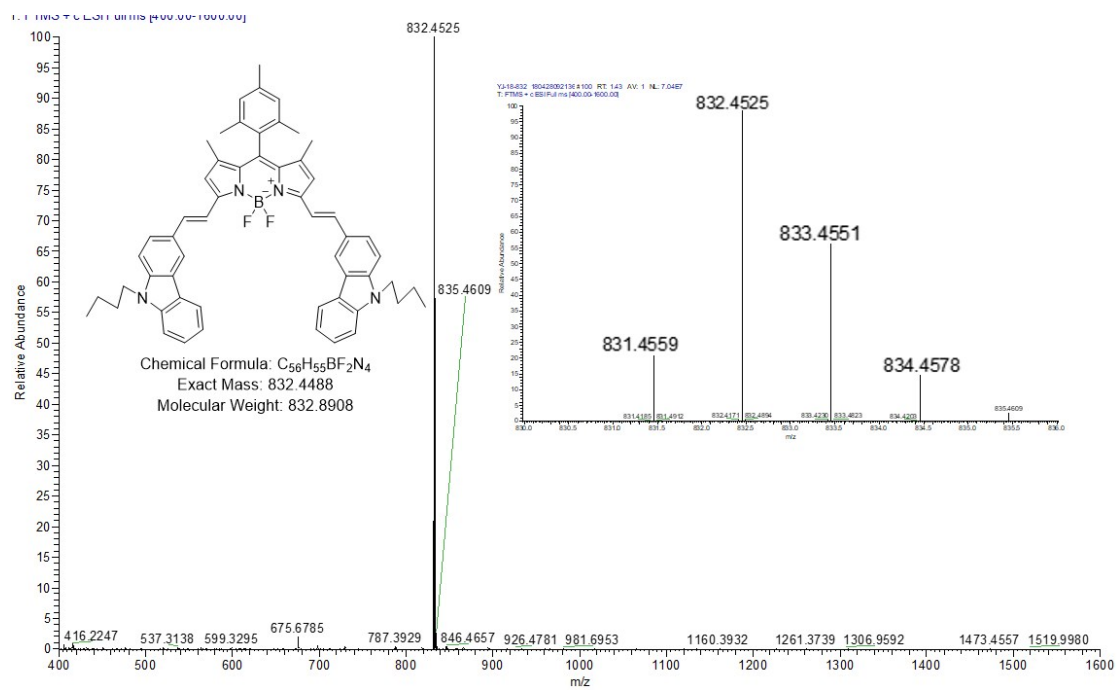

**Figure S6.** HRMS (ESI) spectra of compound **B3**

**Table S1.** The photophysical properties of compounds **B2**, **B3** in DCM

| Compound  | $\lambda_{\text{abs}}$ [nm] | $\lambda_{\text{em}}$ [nm] | $\Delta\nu$ [ $\text{cm}^{-1}$ ] | $\epsilon$ ( $10^5 \cdot \text{M}^{-1} \cdot \text{cm}^{-1}$ ) | $\Phi_{\text{F}}$ | $\tau_{\text{F}}$ [ns] |
|-----------|-----------------------------|----------------------------|----------------------------------|----------------------------------------------------------------|-------------------|------------------------|
| <b>B2</b> | 586                         | 616                        | 831                              | 1.37                                                           | 0.86              | 4.01                   |
| <b>B3</b> | 672                         | 701                        | 616                              | 1.48                                                           | 0.42              | 3.92                   |

Concentration  $1 \times 10^{-5}$  M. Compound **B2** was excited at 520 nm, compound **B3** was excited at 600 nm.



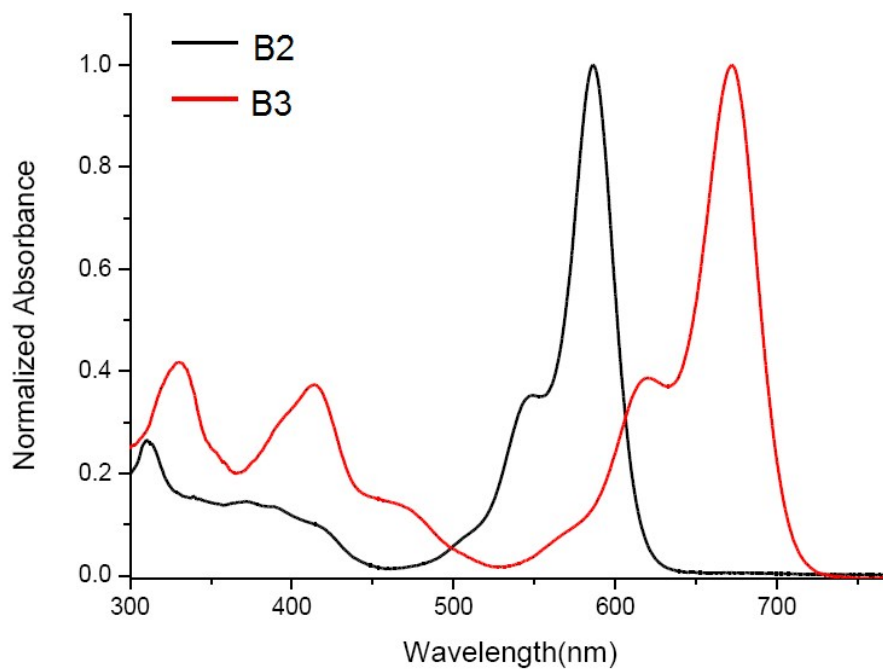

**Figure S7.** UV-vis spectra of compounds **B2**, **B3** in DCM

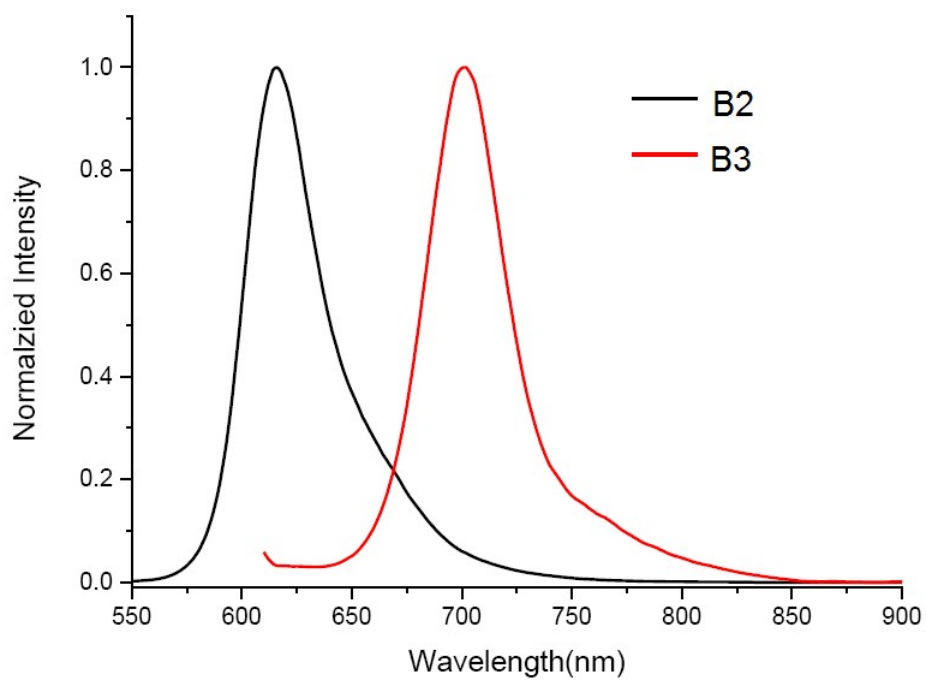

**Figure S8.** Emission spectra of compounds **B2**, **B3** in DCM

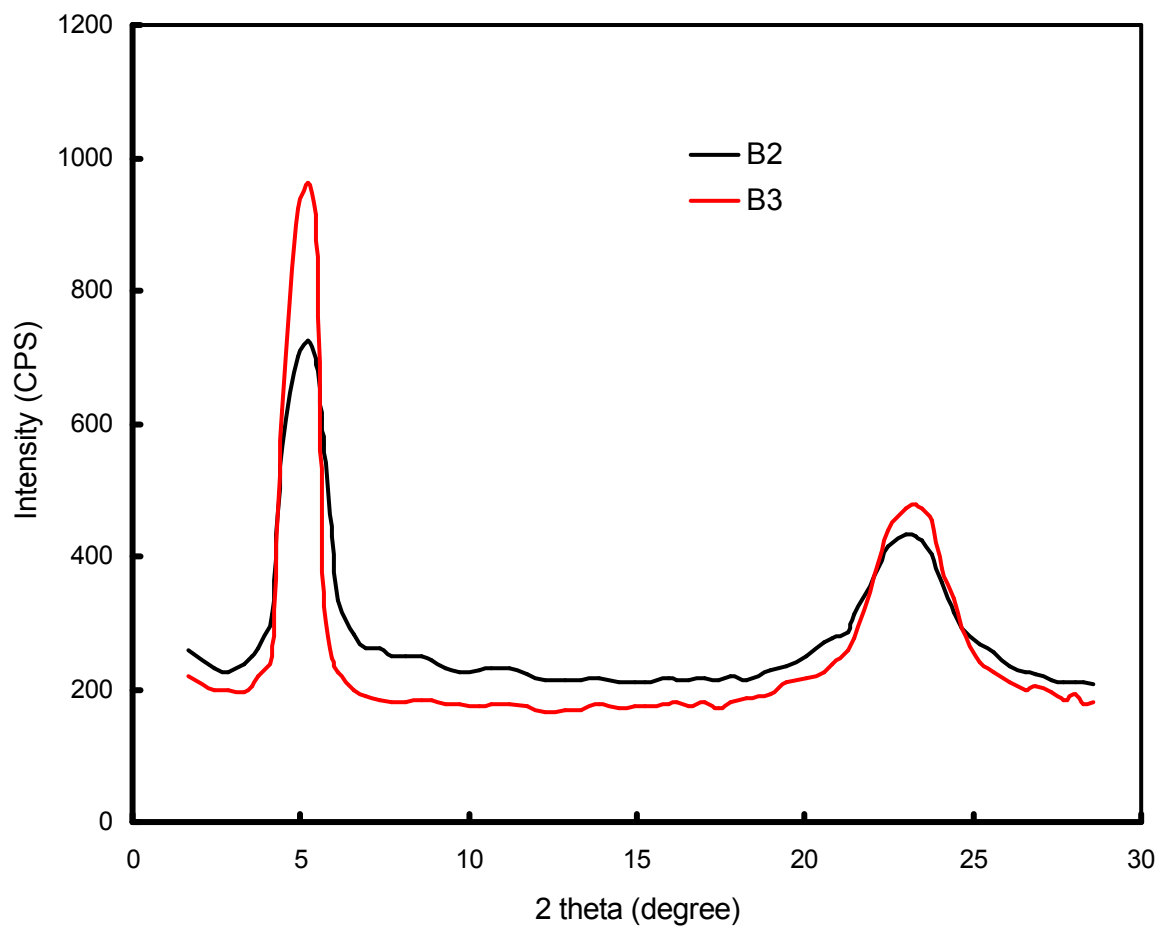

**Figure S9.** XRD patterns of pristine **B2** and **B3**
